# Supplementary material for: Single Cell Center of Mass for the Analysis of BMP Receptor Heterodimers Distributions
Source: Preprints.org preprint supplement (doi:10.20944/preprints202108.0007.v1), 2021-08-02

Control Circle BMPRIb simulated versus experimental data Inverse Transform Sampling check spread n=0.0

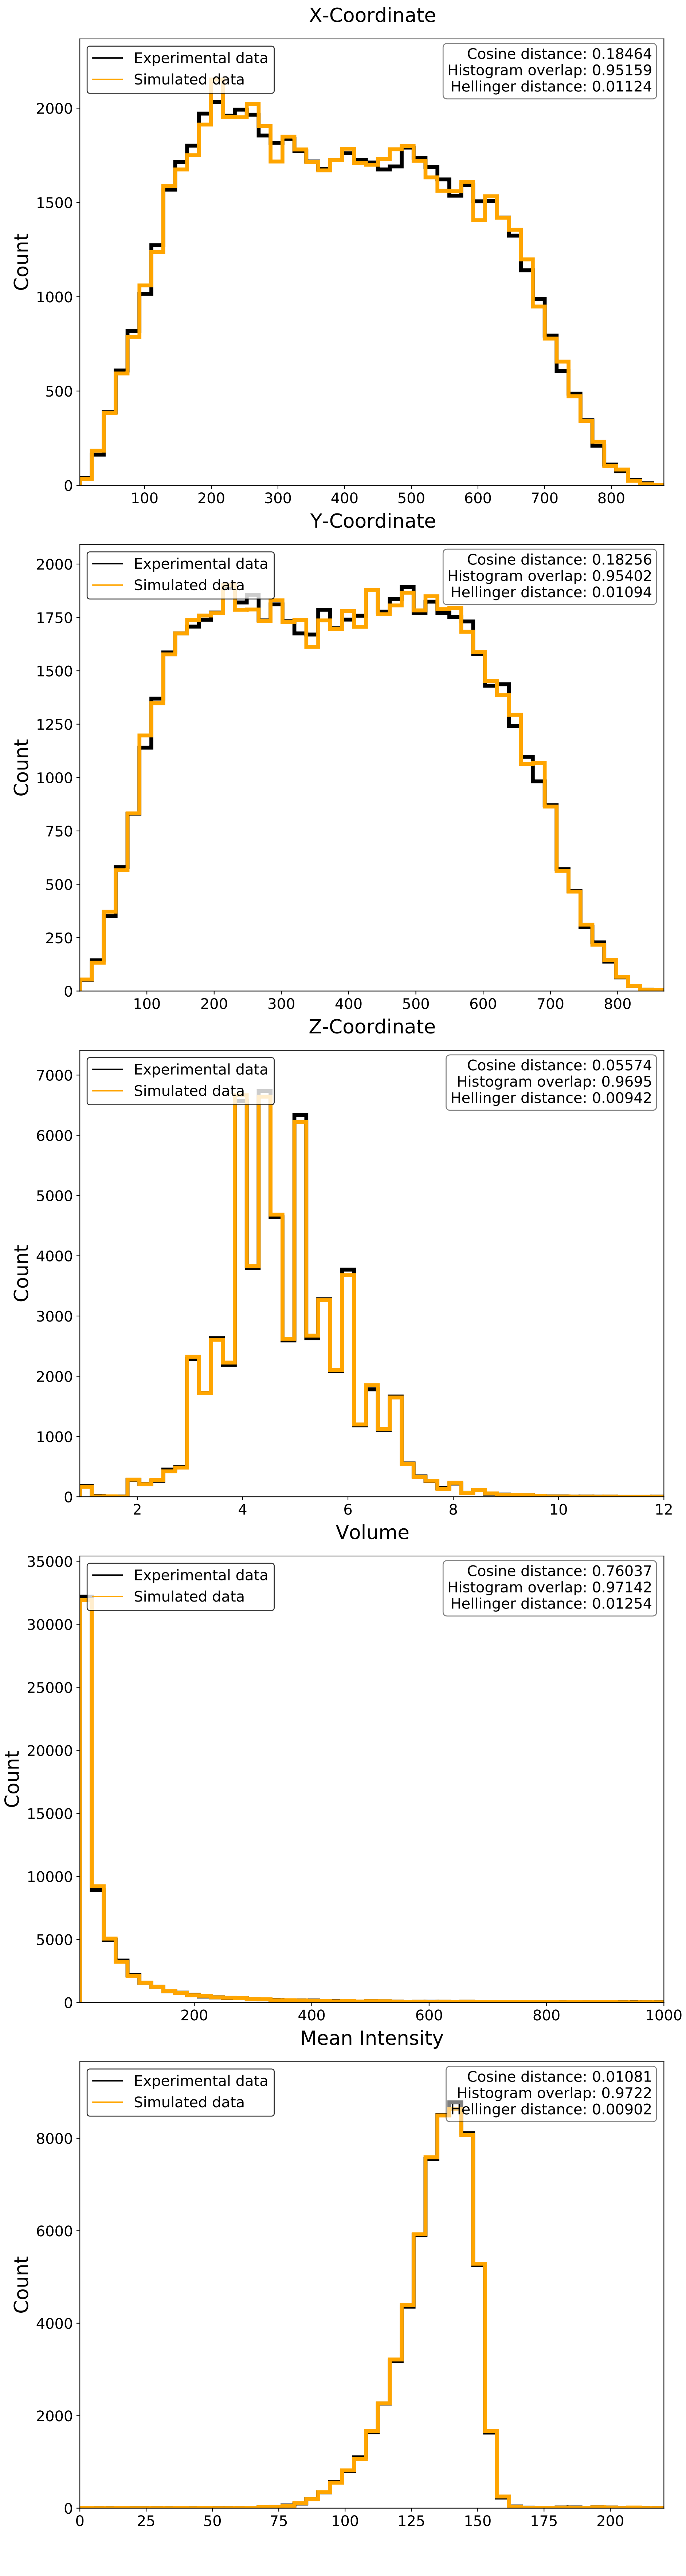

Supplement: Supplementary file 2 [file supplementary]
