# Supplementary material for: Single Cell Center of Mass for the Analysis of BMP Receptor Heterodimers Distributions
Source: Preprints.org preprint supplement (doi:10.20944/preprints202108.0007.v1), 2021-08-02

Random division of experimental data into 2 groups for measure testing

Control cells experimental data

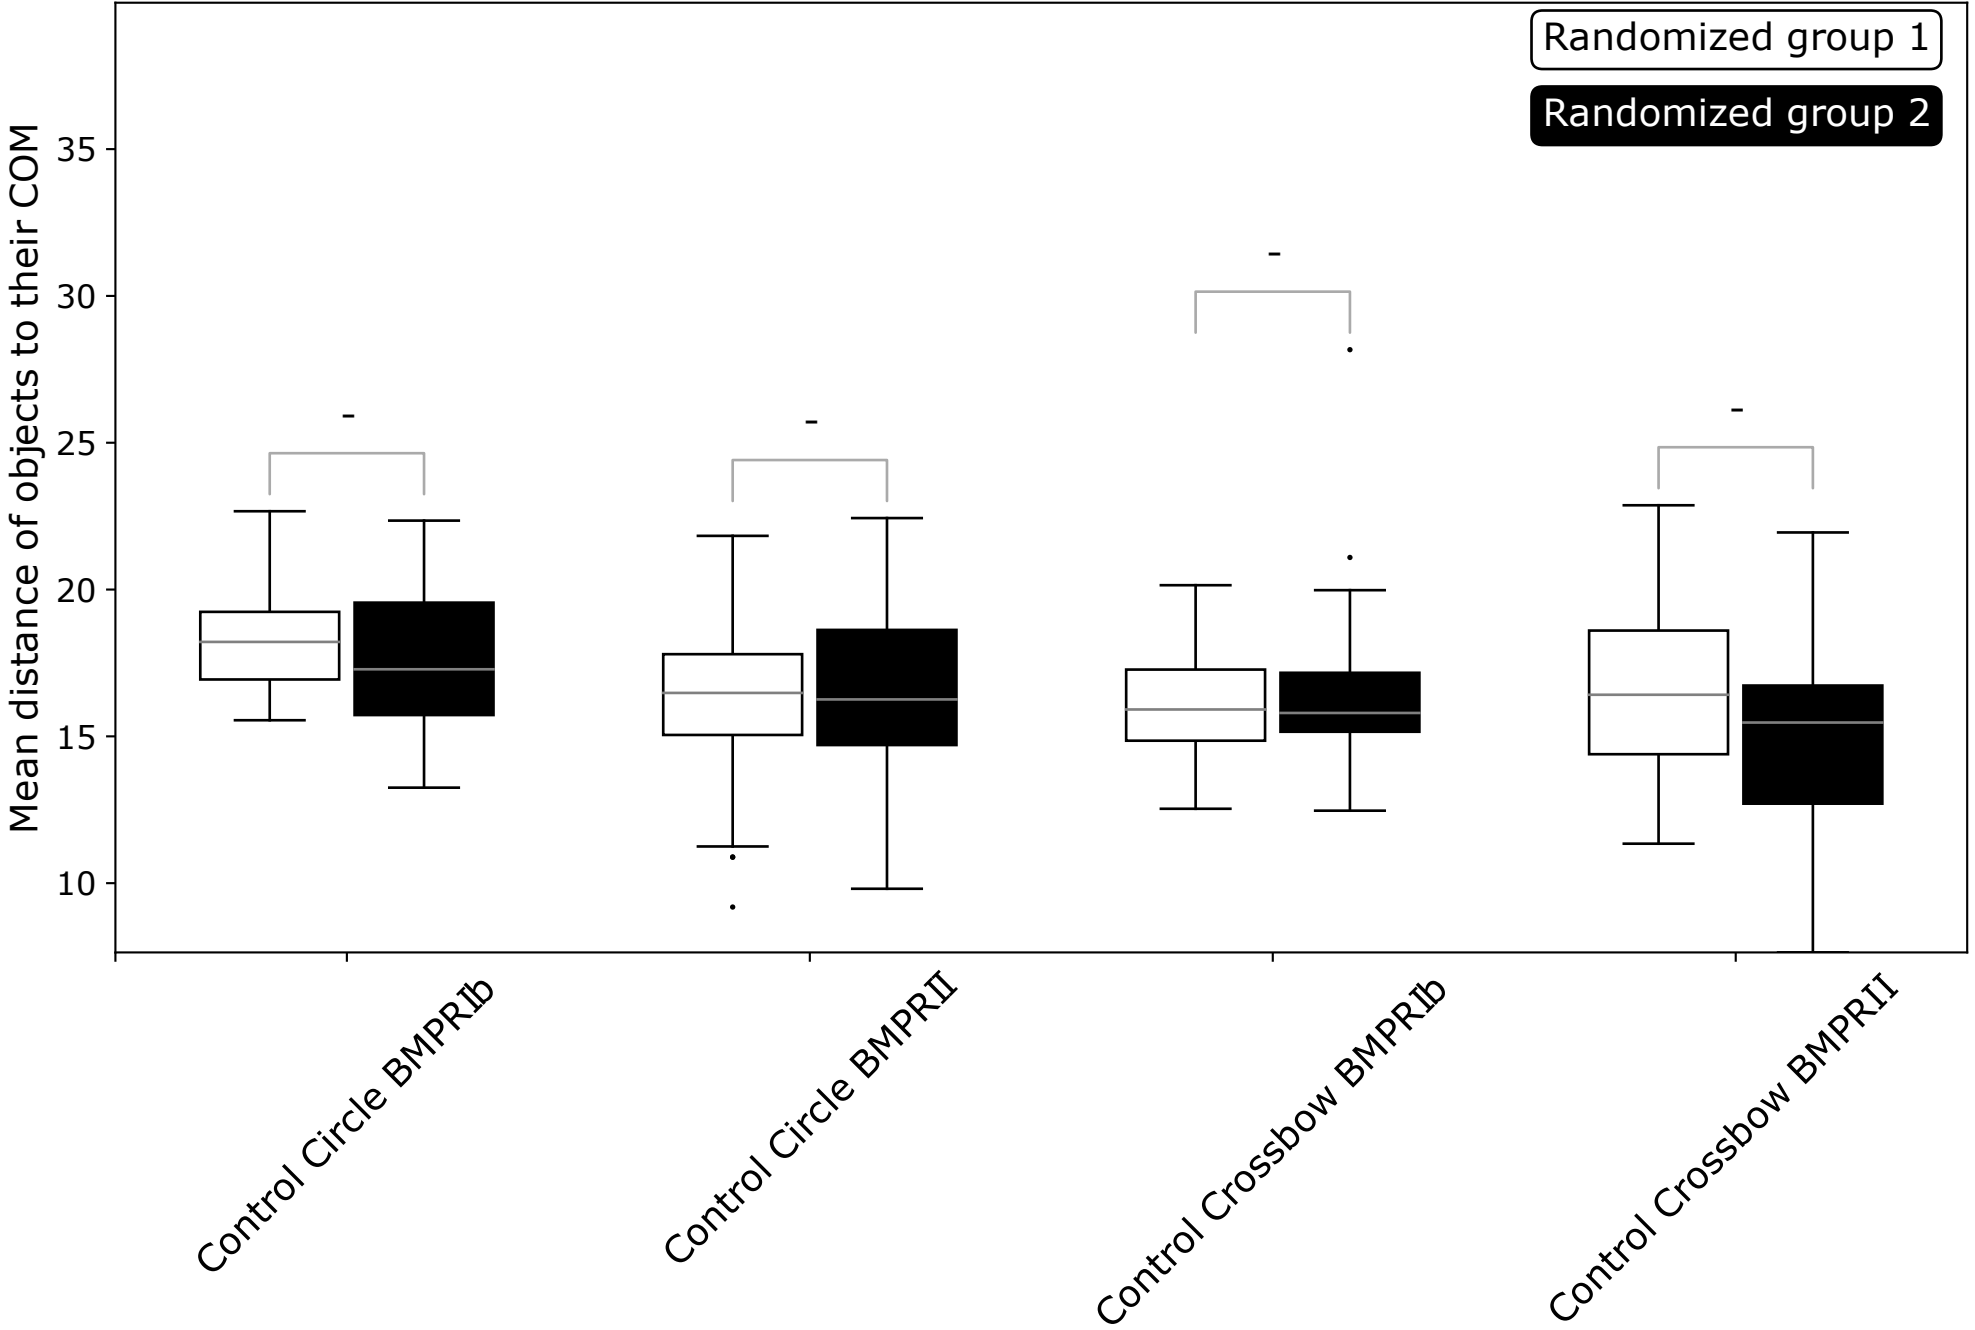

BMP induced cells experimental data

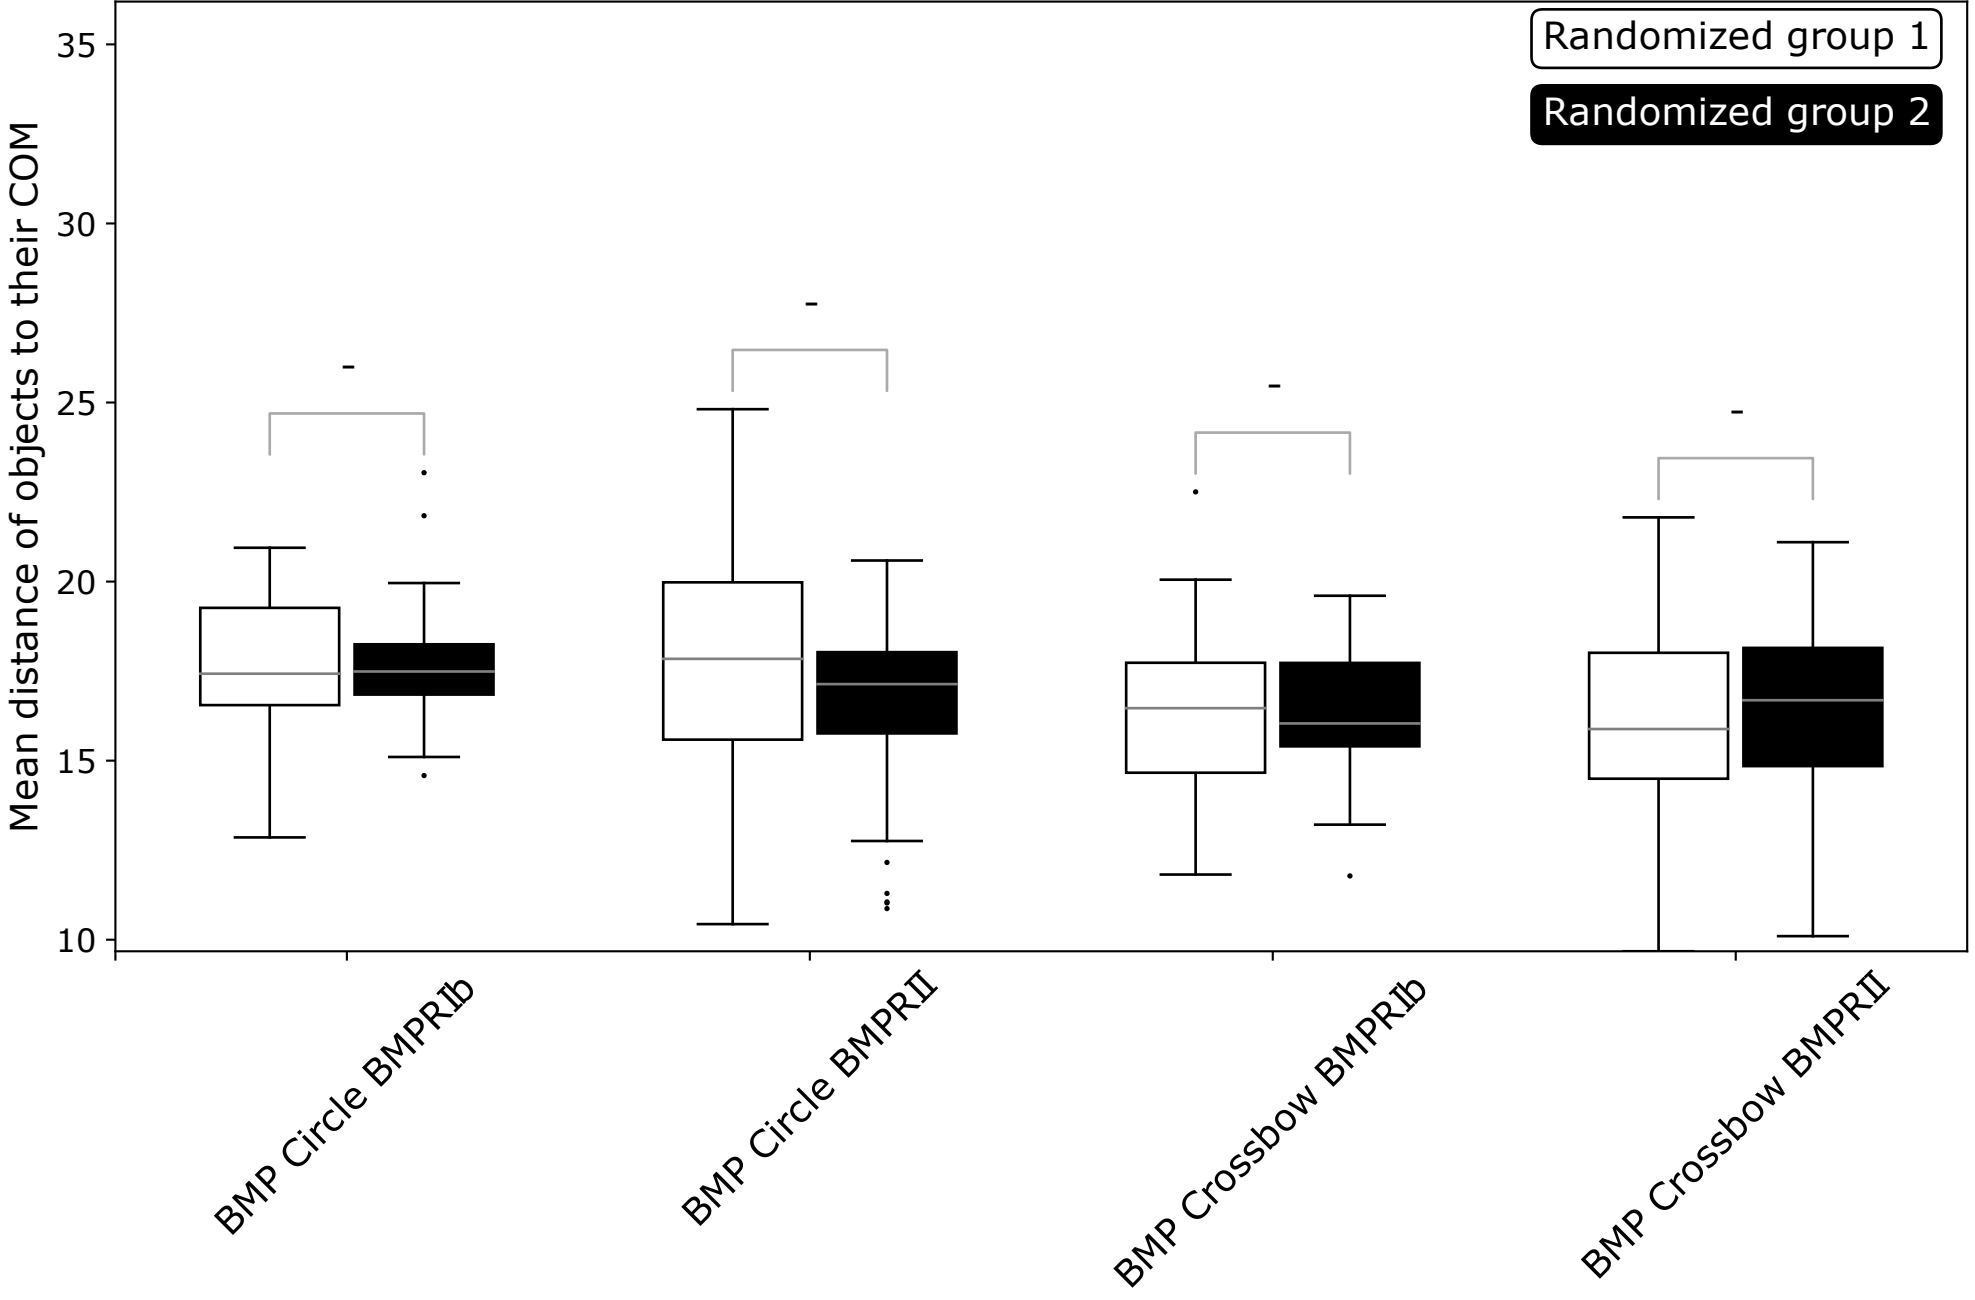

Supplement: Supplementary file 3 [file supplementary]
