# Supplementary figures and images for: Single Cell Center of Mass for the Analysis of BMP Receptor Heterodimers Distributions
Source: Preprints.org preprint supplement (doi:10.20944/preprints202108.0007.v1), 2021-08-02

X-Y Plane

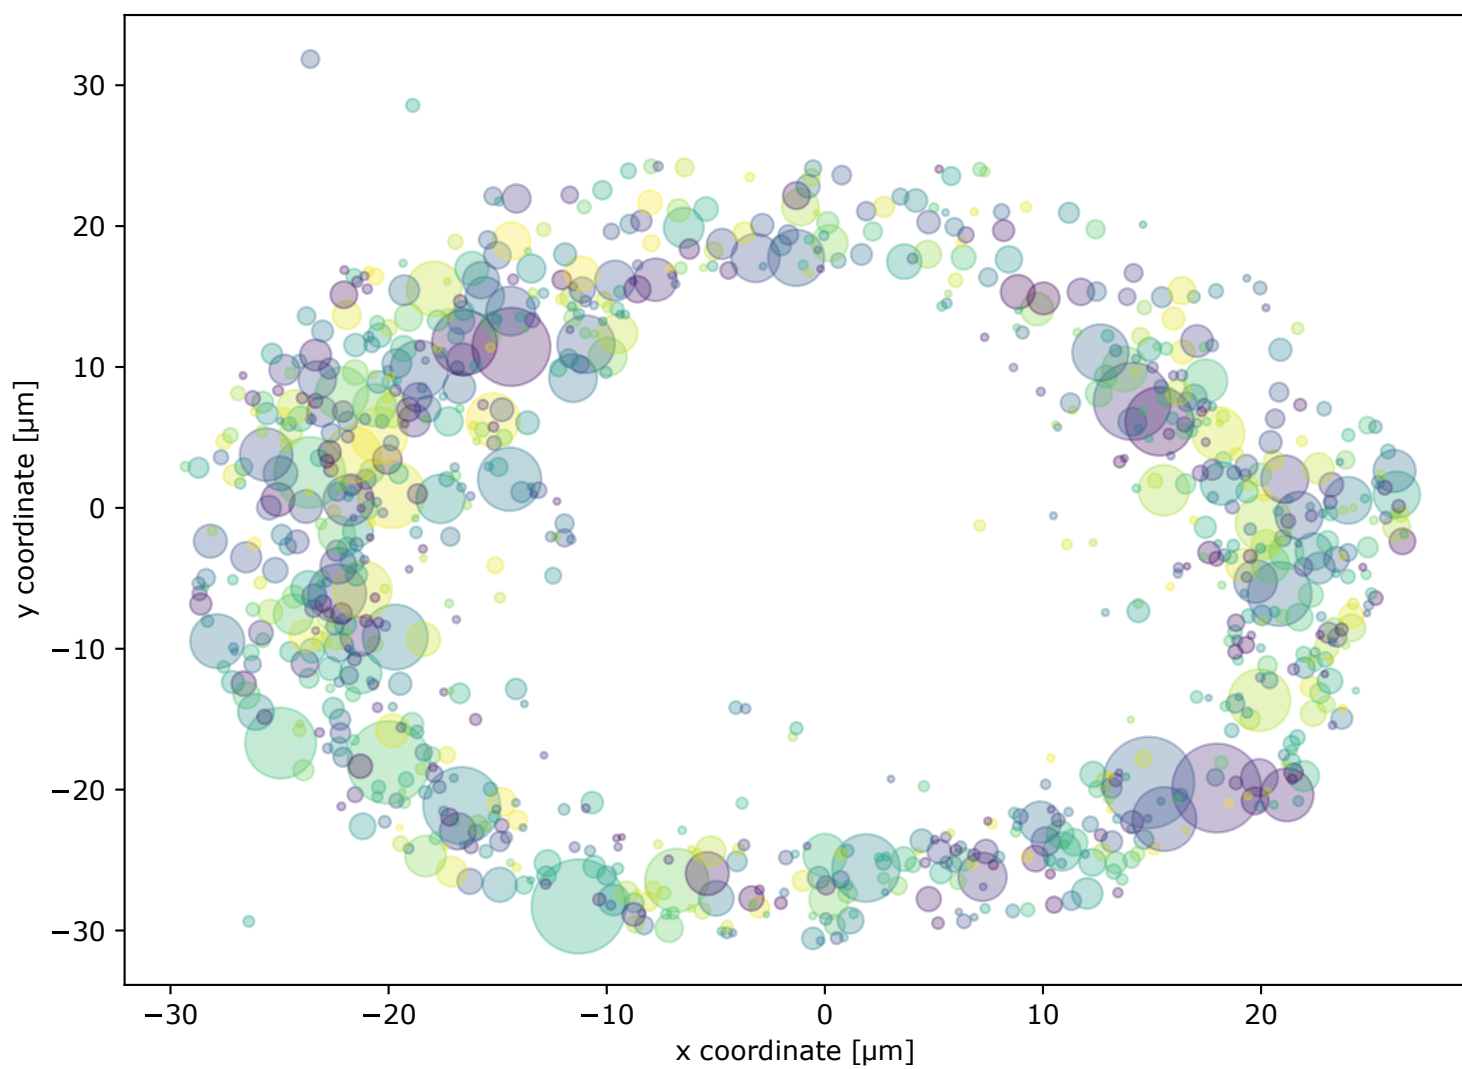

X-Z Plane

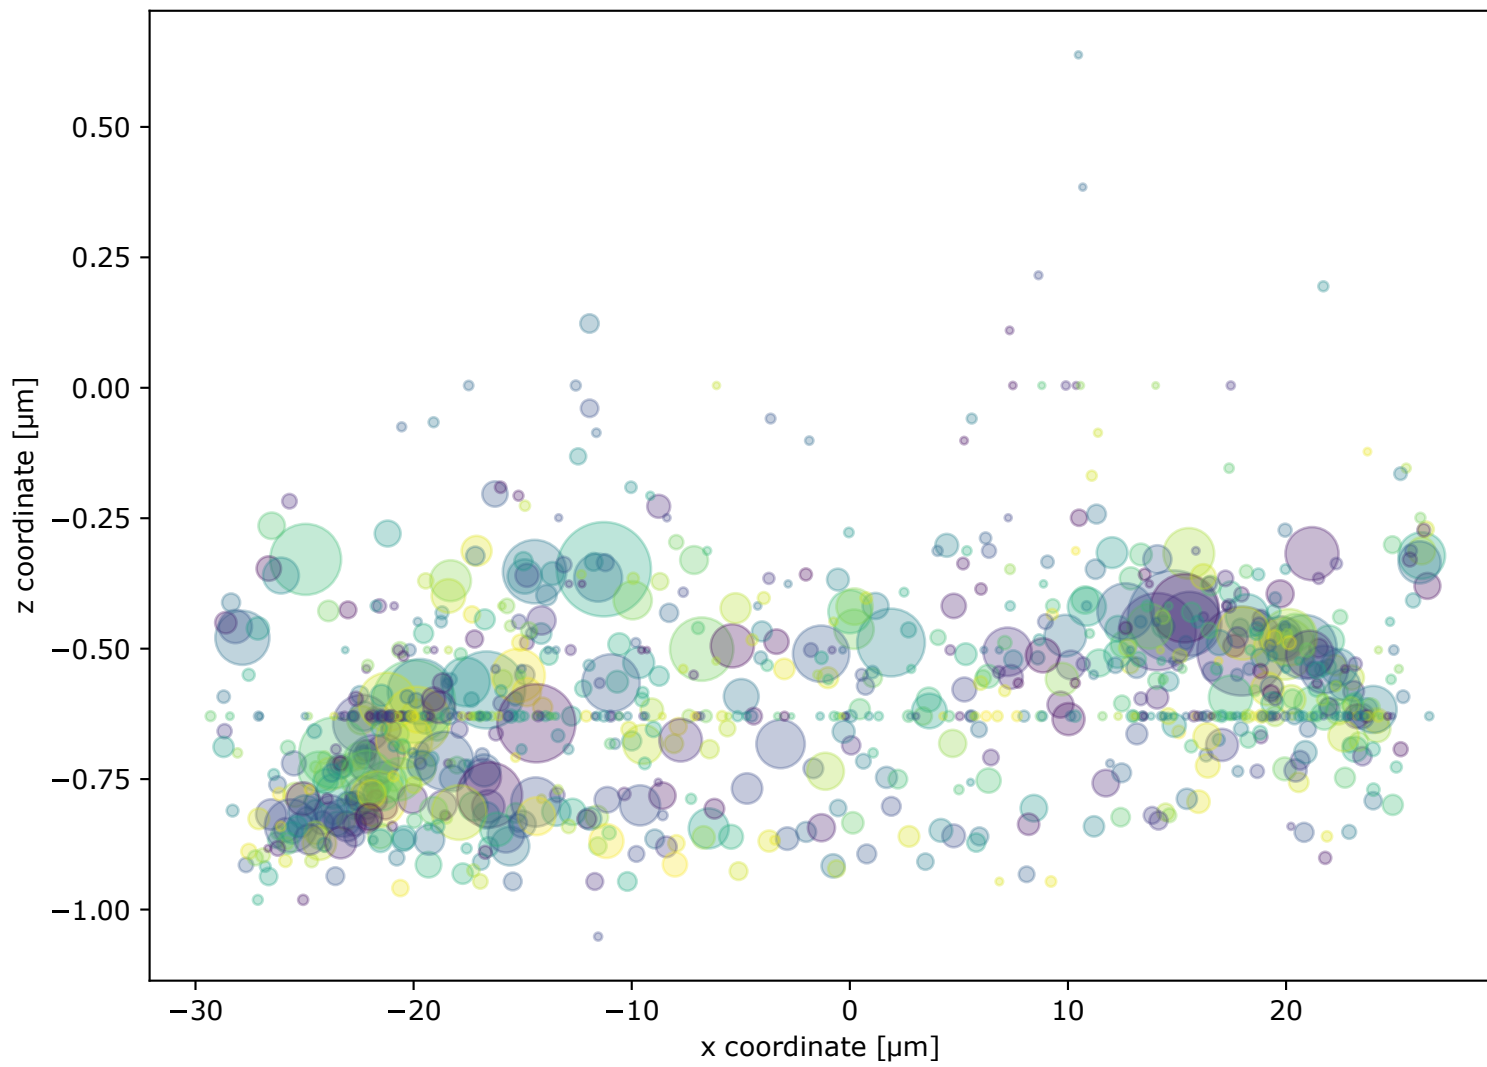

Y-Z Plane

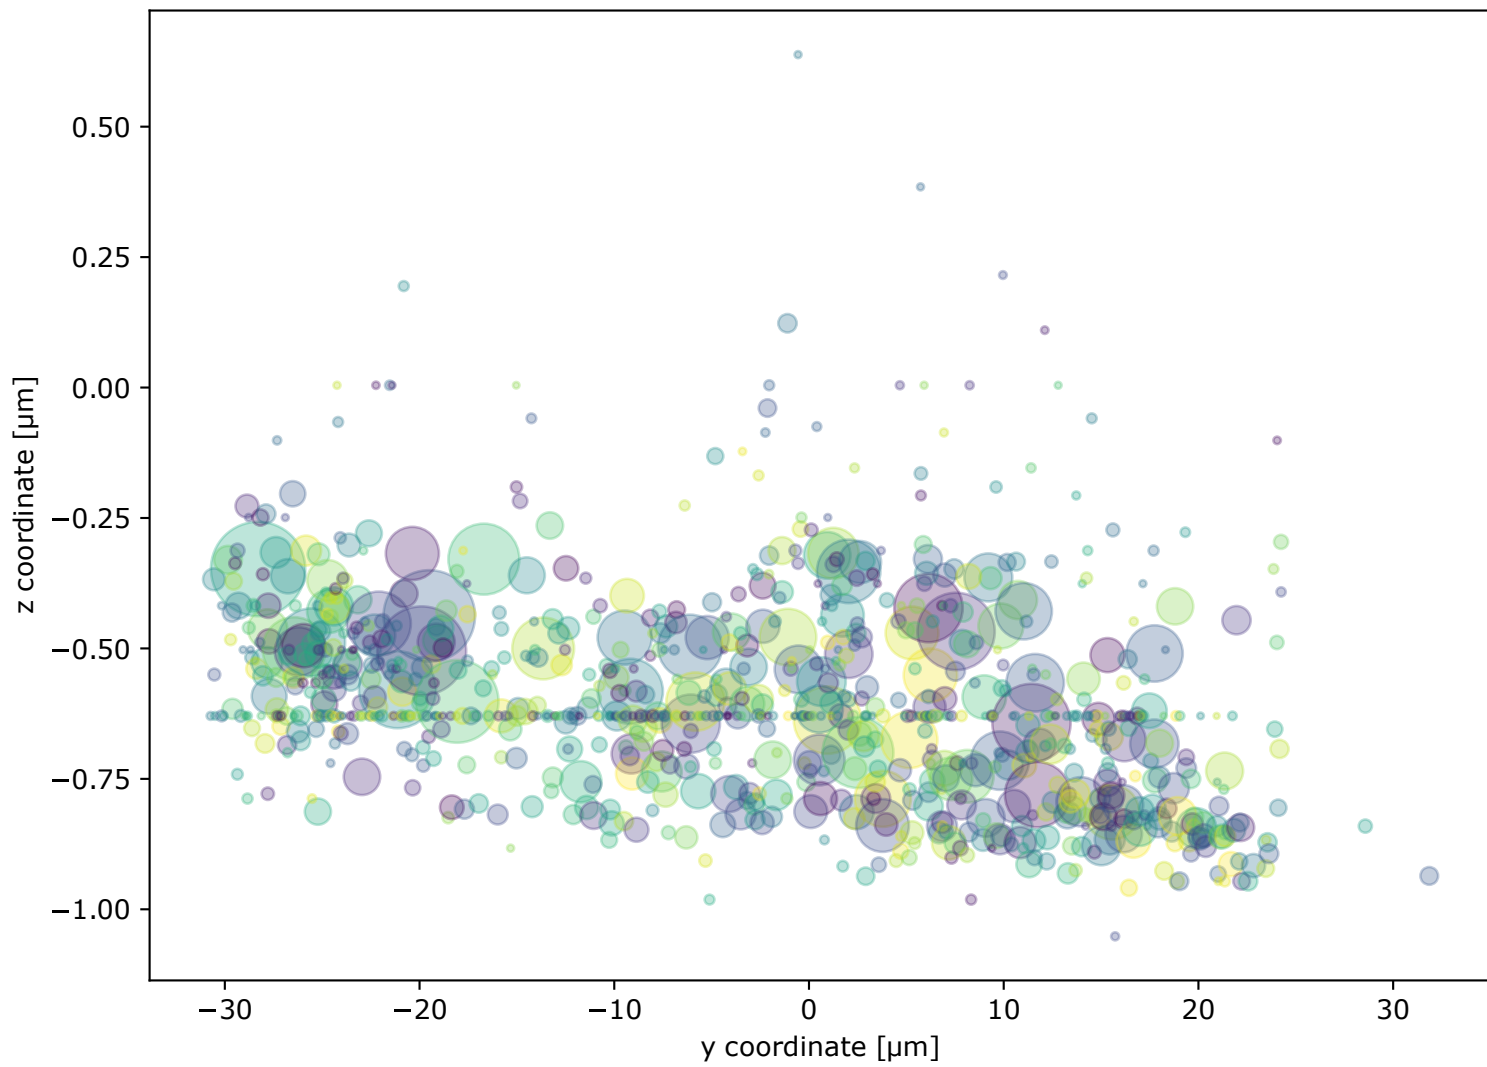

Supplement: Supplementary file 5 [file supplementary]
